# Supplementary material for: Monitoring of Carbon Stocks in Pastures in the Savannas of Brazil through Ecosystem Modeling on a Regional Scale
Source: MDPI journal article supplement (doi:10.3390/land12010060), 2022-12-26
Supplement: s1 [file s1]

# Monitoring of carbon stocks in pastures in the savannas of Brazil through ecosystem modeling on a regional scale

## Supplementary material

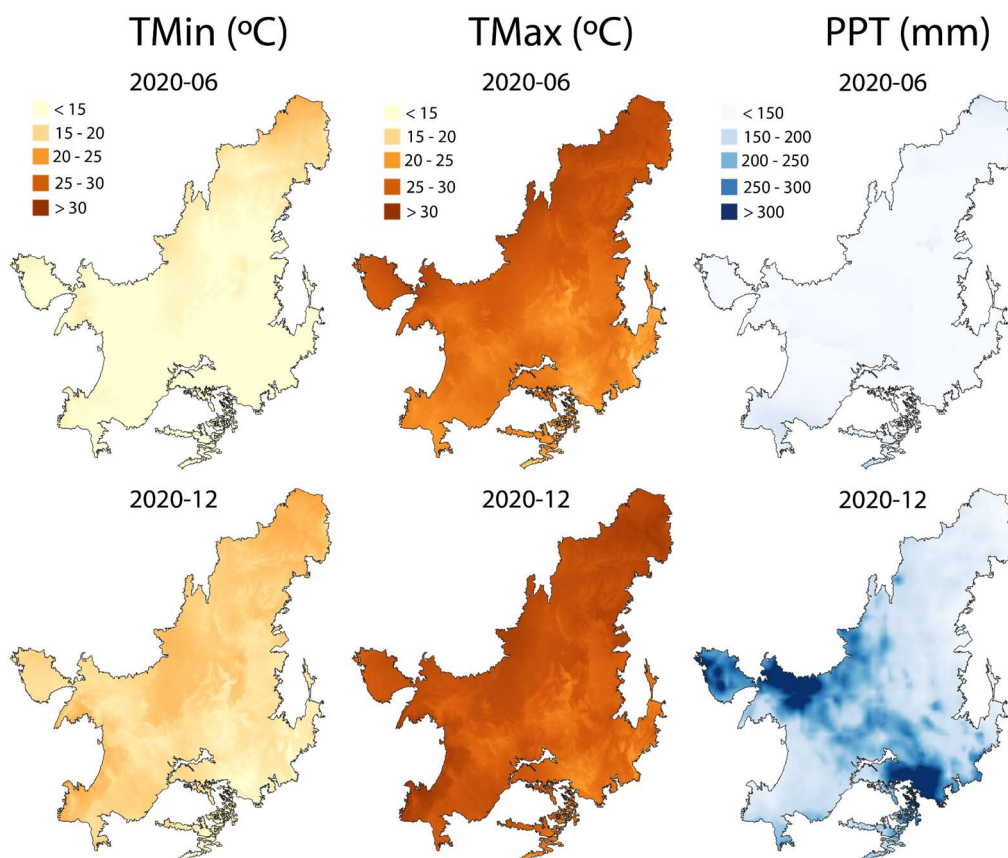

Figure S1: Maps of climate variables in the Cerrado, obtained from the Terraclimate database, and used to model carbon stocks in the pasture areas of the Biome. (TMIN - Minimum temperature; TMAX - Maximum temperature; PPT - Precipitation; For illustration, we used data from June/2020 and December/2020).

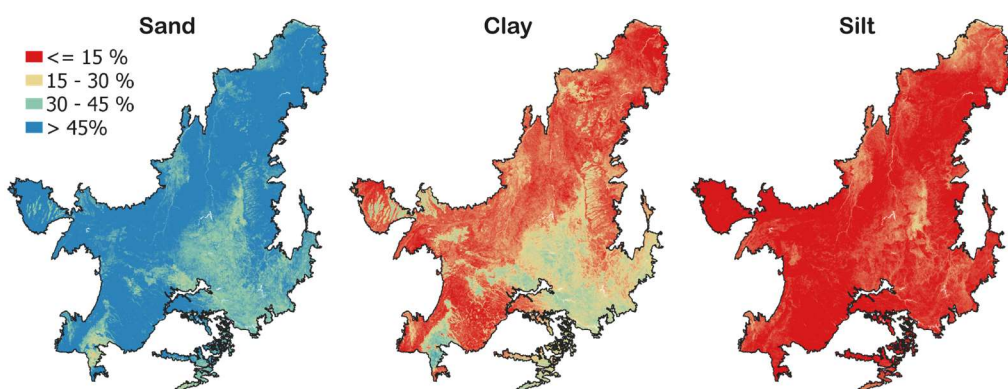

Figure S2: Soil texture maps in the Cerrado, obtained from the SoilGrids database and used to model carbon stocks in the pasture areas of the Biome. Density and acidity (Ph) maps were obtained on the same basis.

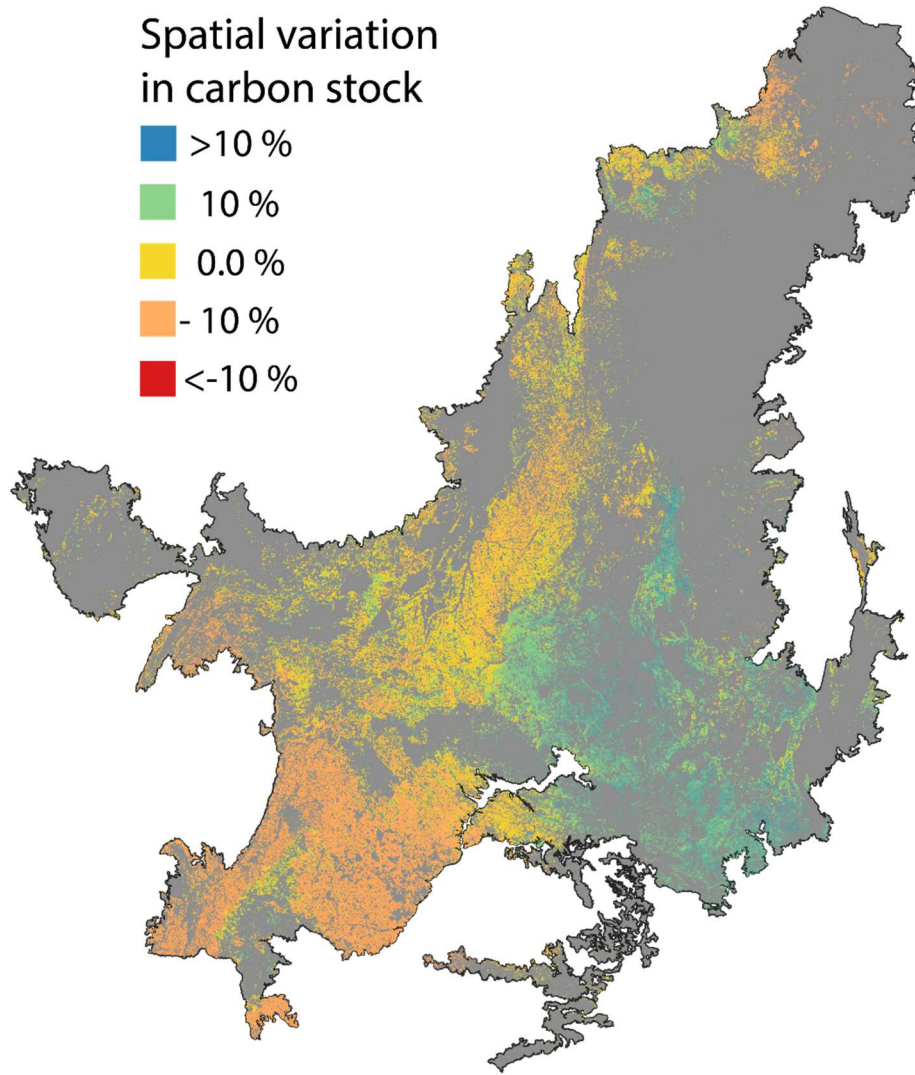

Figure S3: % difference between local and mean SOC stock in the pasture areas of the Cerrado biome (layer 0-20 cm).

The % difference was calculated based on the following equation:

$$X_{i\%} = \left( \frac{X_i}{\bar{X}} - 1 \right) * 100$$

Where:  $X_{i\%}$  is the SOC stock for a given pixel  $X_i$  and  $\bar{X}$  is the mean SOC stock for all the pixels corresponding to the Cerrado pastures.

Table S1: Location and soil characteristics in the 0-20 cm layer of the sites used in the calibration and validation process of the century model to represent pasture areas in the Cerrado.

| State | Municipalities      | Pasture age (years) | Carbon MgC/ha <sup>-1</sup> | Sand (%) | Silt (%) | Clay (%) | Density (g/cm <sup>3</sup> ) | p.H | Annual precipitation (mm) |
|-------|---------------------|---------------------|-----------------------------|----------|----------|----------|------------------------------|-----|---------------------------|
| MT    | Barra do Garças     | 27                  | 33.45                       | 59.50    | 19.00    | 21.50    | 1.4                          | 6.0 | 1242.38                   |
| GO    | Bom Jardim          | 28                  | 20.29                       | 85.25    | 10.00    | 4.75     | 1.7                          | 5.6 | 1242.38                   |
| TO    | Campos Lindos       | 11                  | 21.07                       | 87.38    | 2.60     | 10.03    | 1.5                          | 5.6 | 1501.25                   |
| TO    | Cariri do Tocantins | 27                  | 32.33                       | 59.98    | 8.13     | 31.90    | 1.2                          | 5.0 | 1191.67                   |
| MA    | Estreito            | 11                  | 46.19                       | 38.00    | 14.25    | 47.75    | 1.5                          | 5.8 | 1394.34                   |
| GO    | Goiás               | 19                  | 38.71                       | 61.50    | 21.25    | 17.25    | 1.4                          | 5.9 | 1452.23                   |
| MA    | Pastos Bons         | 20                  | 45.39                       | 44.75    | 10.25    | 45.00    | 1.5                          | 5.7 | 1018.31                   |
| TO    | Rio dos Bois        | 11                  | 25.28                       | 78.13    | 4.63     | 17.25    | 1.3                          | 4.9 | 1387.41                   |
| MA    | Sucupira do Riachão | 23                  | 40.50                       | 55.50    | 9.50     | 35.00    | 1.3                          | 4.7 | 1018.31                   |
| GO    | Água Fria de Goiás  | >35                 | 51.31                       | 7.50     | 37.75    | 54.75    | 1.2                          | 5.3 | 1132                      |
| MA    | Balsas              | >35                 | 27.67                       | 77.50    | 2.75     | 19.75    | 1.6                          | 5.7 | 1242                      |
| MT    | Barra do Garças     | >35                 | 31.64                       | 67.00    | 11.00    | 22.00    | 1.5                          | 5.3 | 968                       |
| BA    | Barreiras           | >35                 | 29.31                       | 80.75    | 7.00     | 12.25    | 1.6                          | 5.4 | 863                       |
| PI    | Bom Jesus Piauí     | >35                 | 23.65                       | 63.50    | 22.00    | 14.50    | 1.6                          | 5.7 | 830                       |
| GO    | Campinorte          | >35                 | 30.70                       | 60.00    | 11.50    | 28.50    | 1.5                          | 5.4 | 1398                      |
| GO    | Cocalzinho          | >35                 | 41.01                       | 54.00    | 16.00    | 30.0     | 1.4                          | 5.8 | 1398                      |
| TO    | Conceição           | >35                 | 46.14                       | 20.50    | 35.00    | 44.50    | 1.5                          | 5.9 | 1333                      |
| GO    | Cristalina          | >35                 | 48.86                       | 11.50    | 22.50    | 66.00    | 1.1                          | 5.5 | 1148                      |

|    |                 |     |       |       |       |       |     |     |      |
|----|-----------------|-----|-------|-------|-------|-------|-----|-----|------|
| GO | Edéia           | >35 | 37.33 | 54.25 | 15.75 | 30.00 | 1.5 | 6.9 | 1325 |
| GO | Flores de Goiás | >35 | 40.92 | 25.25 | 25.50 | 49.25 | 1.6 | 5.5 | 1145 |
| GO | Hidrolândia     | >35 | 56.03 | 44.50 | 19.00 | 36.50 | 1.4 | 5.5 | 1325 |
| GO | Monte Alegre    | >35 | 38.22 | 62.50 | 17.25 | 20.25 | 1.6 | 5.9 | 1317 |
| GO | Montes Claros   | >35 | 32.71 | 71.75 | 12.75 | 15.50 | 1.5 | 5.7 | 1242 |
| GO | Nova Crixás     | >35 | 27.68 | 62.50 | 9.00  | 28.50 | 1.5 | 5.4 | 1452 |
| TO | Nova Olinda     | >35 | 25.93 | 56.50 | 27.25 | 16.25 | 1.7 | 5.4 | 1452 |
| GO | Mundo Novo      | >35 | 21.68 | 68.25 | 11.25 | 20.50 | 1.6 | 5.5 | 1501 |
| GO | Pirenópolis     | >35 | 38.80 | 49.75 | 16.75 | 33.50 | 1.4 | 5.6 | 1398 |
| GO | Rianópolis      | >35 | 31.95 | 60.50 | 17.75 | 21.75 | 1.5 | 6.0 | 1398 |
| GO | Rio Verde       | >35 | 35.24 | 27.50 | 22.25 | 50.25 | 1.2 | 5.8 | 1303 |
| BA | São Desidério   | >35 | 22.61 | 70.75 | 4.50  | 24.75 | 1.6 | 6.0 | 863  |

---

Table S2: Modified parameters in Century to simulate traditional pasture management in the Cerrado biome.

|                                                                                      | Default of model | Pasture conventional management |
|--------------------------------------------------------------------------------------|------------------|---------------------------------|
| Crop.100 file                                                                        |                  |                                 |
| PRDX(1) : potential aboveground monthly production for crops ( $\text{g C m}^{-2}$ ) | 0.3              | 0.3                             |
| PPDF(1) : optimum temperature for production for parameterization                    | 30               | 22                              |
| CFRTC(1): maximum fraction of C allocated to roots under maximum nutrient stress     | 0.4              | 0.3                             |
| CFRTC(2): minimum fraction of C allocated to roots with no nutrient stress           | 0.25             | 0.25                            |
| CFRTCW(1): maximum fraction of C allocated to roots under maximum water stress       | 0.6              | 0.4                             |
| CFRTCW(2): minimum fraction of C allocated to roots with no water stress             | 0.2              | 0.1                             |
| Tree.100 file                                                                        |                  |                                 |
| PRDX(1): potential aboveground monthly production for crops ( $\text{g C m}^{-2}$ )  | 0.5              | 0.26                            |

Fonte: Silva 2019.

Table S3: Datasets used to model pasture carbon stock in the Cerrado biome pastures.

| Datasets                      | Study stage / component          | Resolution              | Date      | Source                                                                          |
|-------------------------------|----------------------------------|-------------------------|-----------|---------------------------------------------------------------------------------|
| Conversion year               | Calibration and validation sites | 30m                     | 1985–2010 | <a href="https://github.com/lapig-ufg/tvi">https://github.com/lapig-ufg/tvi</a> |
|                               | Cerrado pasture maps             | 30m                     | 1985–2019 | <a href="https://atlasdaspastagens.ufg.br">https://atlasdaspastagens.ufg.br</a> |
| Weather data                  | Calibration and validation sites | Nearest weather station | 1980–2017 | Brazilian Institute of Meteorology (INMET)                                      |
|                               | Spatialization (Cerrado pasture) | 4 km                    | 1985–2019 | TerraClimate                                                                    |
| Soil texture, density, and pH | Calibration and validation sites | -                       | 2010      | Assad et al. 2013                                                               |
|                               | Pasture map resampled            | 1 km                    | 1985–2019 | SoilGrids                                                                       |
